# Supplementary material for: Synthesis of diaminoacetylene from cyanido ligands of the octacyanidotungstate complex
Source: Royal Society of Chemistry journal article supplement (doi:10.1039/d4nj02448f), 2024-01-01
Supplement: d4nj02448f1.pdf [file d4nj02448f1.pdf]

## Synthesis of diaminoacetylene from cyanido ligands of the octacyanidotungstate(IV) complex

Janusz Szklarzewicz\*, Maciej Hodorowicz and Anna Jurowska

Jagiellonian University, Faculty of Chemistry, Gronostajowa 2, 30-387 Kraków, Poland

\*corresponding author e-mail: janusz.szklarzewicz@uj.edu.pl

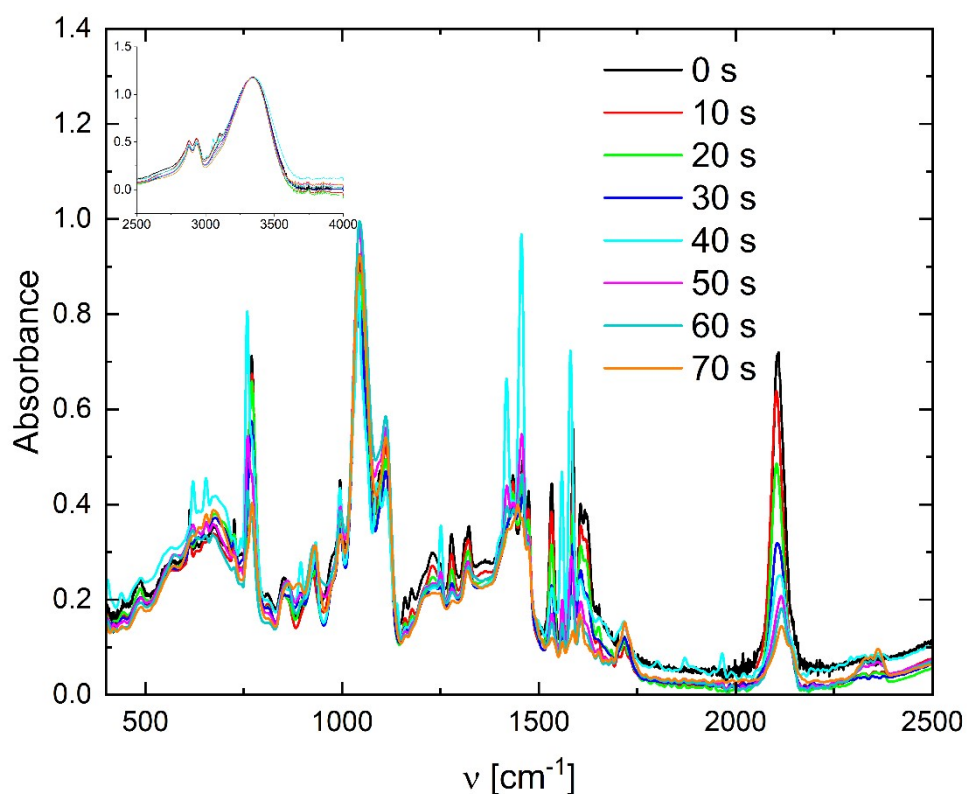

**Figure S1.** The IR (after ATR correction) spectra of glycerol solution of (bpyH)<sub>3</sub>(H<sub>3</sub>O)[W(CN)<sub>8</sub>]·H<sub>2</sub>O (conditions as in synthesis of **1**) T = 22 °C. The legend shows the heating time.

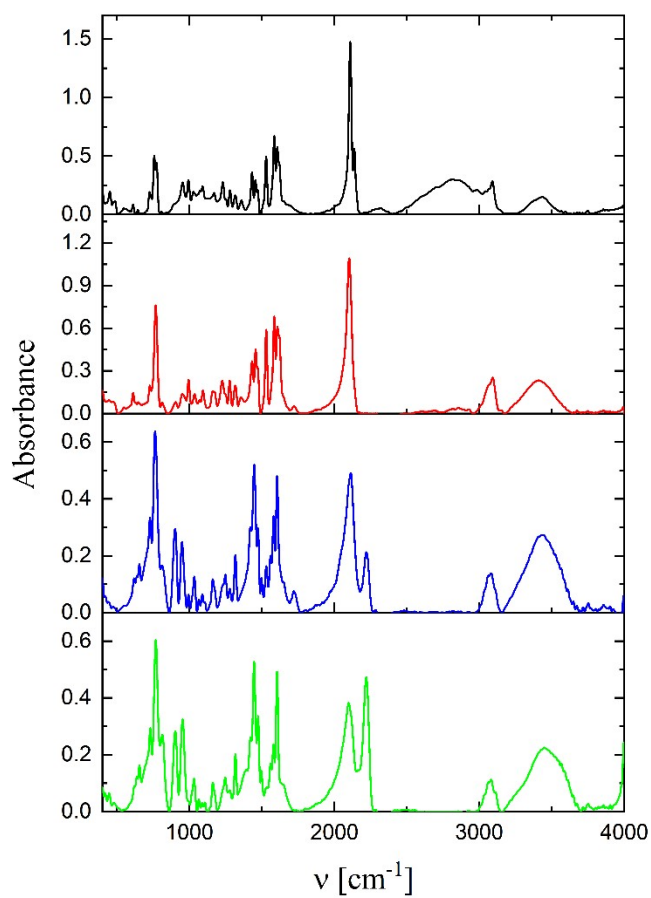

**Figure S2.** The IR spectra of  $(\text{bpyH})_3(\text{H}_3\text{O})[\text{W}(\text{CN})_8]\cdot\text{H}_2\text{O}$  decomposed in solid state.  $T = 295.15 \text{ K}$ . Black line - spectrum of  $(\text{bpyH})_3(\text{H}_3\text{O})[\text{W}(\text{CN})_8]\cdot\text{H}_2\text{O}$ , red line - spectrum recorded after 5s of heating, blue line - spectrum recorded after 20 s of heating and green line - spectrum recorded after 40 s of heating.

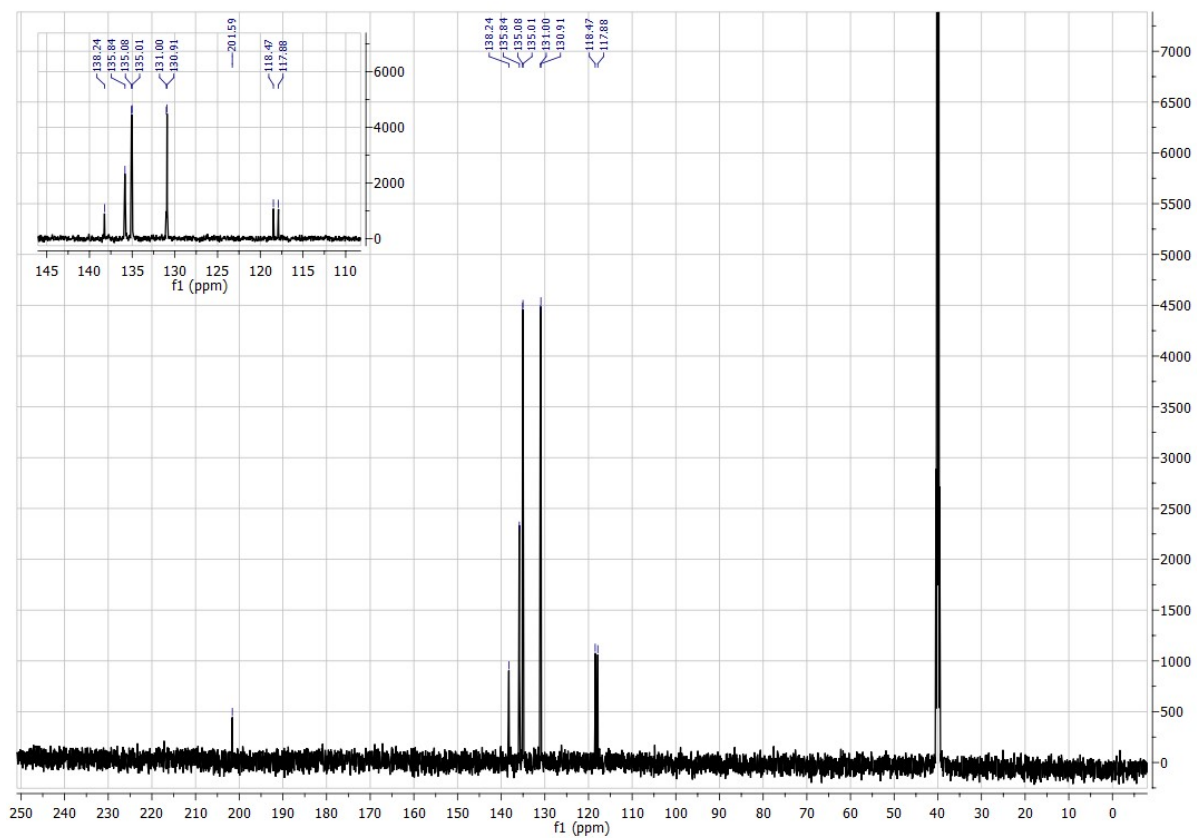

**Figure S3.** <sup>13</sup>C-NMR spectrum of **1**. (DMSO-*d*<sub>6</sub>)  $\sigma$  [ppm] = 201.59 (C≡C), 138.24 (Ar), 135.84 (Ar), 135.08 (Ar), 135.01 (Ar), 131.00 (Ar), 130.91 (Ar), 118.47 (C≡N), 117.88 (C≡N).

**Table S1.** Crystal data and structure refinement for **1-3**.

|                                                 |              | <b>1</b>                                                                                                                                                       | <b>2</b>                                                                                                                                         | <b>3</b>                                                                                                                                           |
|-------------------------------------------------|--------------|----------------------------------------------------------------------------------------------------------------------------------------------------------------|--------------------------------------------------------------------------------------------------------------------------------------------------|----------------------------------------------------------------------------------------------------------------------------------------------------|
| Empirical formula                               |              | C <sub>56</sub> H <sub>50</sub> N <sub>8</sub> O <sub>2</sub> P <sub>2</sub> W                                                                                 | C <sub>8</sub> H <sub>8</sub> N <sub>8</sub> O <sub>2</sub> Rb <sub>2</sub> W                                                                    | C <sub>16</sub> H <sub>10</sub> Cs <sub>4</sub> N <sub>16</sub> OW <sub>2</sub>                                                                    |
| Formula moiety                                  |              | (PPh <sub>4</sub> <sup>+</sup> ) <sub>2</sub> ,<br>[W(CN) <sub>6</sub> (C <sub>2</sub> N <sub>2</sub> H <sub>4</sub> ) <sup>2-</sup> ],<br>2(H <sub>2</sub> O) | (Rb <sup>+</sup> ) <sub>2</sub> ,<br>[W(CN) <sub>6</sub> (C <sub>2</sub> N <sub>2</sub> H <sub>4</sub> ) <sup>2-</sup> ],<br>2(H <sub>2</sub> O) | (Cs <sup>+</sup> ) <sub>2</sub> ,<br>[W(CN) <sub>6</sub> (C <sub>2</sub> N <sub>2</sub> H <sub>4</sub> ) <sup>2-</sup> ],<br>0.5(H <sub>2</sub> O) |
| Formula weight                                  |              | 1108.80                                                                                                                                                        | 601.00                                                                                                                                           | 1331.66                                                                                                                                            |
| Temperature [K]                                 |              | 260(2)                                                                                                                                                         | 293(2)                                                                                                                                           | 100(2)                                                                                                                                             |
| Wavelength [Å]                                  |              | 1.54184                                                                                                                                                        | 0.71073                                                                                                                                          | 0.71073                                                                                                                                            |
| Crystal system                                  |              | Triclinic                                                                                                                                                      | Monoclinic                                                                                                                                       | Monoclinic                                                                                                                                         |
| Space group                                     |              | P $\bar{1}$                                                                                                                                                    | P 2 <sub>1</sub> /c                                                                                                                              | P c                                                                                                                                                |
| Unit cell dimensions                            | a [Å]        | 12.61380(10)                                                                                                                                                   | 8.5484(2)                                                                                                                                        | 11.8245(3)                                                                                                                                         |
|                                                 | b [Å]        | 21.62890(10)                                                                                                                                                   | 14.3462(3)                                                                                                                                       | 8.6678(2)                                                                                                                                          |
|                                                 | c [Å]        | 21.86200(10)                                                                                                                                                   | 12.8770(2)                                                                                                                                       | 14.9294(4)                                                                                                                                         |
|                                                 | $\alpha$ [°] | 117.8730(10)                                                                                                                                                   | 90                                                                                                                                               | 90                                                                                                                                                 |
|                                                 | $\beta$ [°]  | 90.93                                                                                                                                                          | 90.846(2)                                                                                                                                        | 98.581(2)                                                                                                                                          |
|                                                 | $\gamma$ [°] | 103.30                                                                                                                                                         | 90                                                                                                                                               | 90                                                                                                                                                 |
| Volume [Å <sup>3</sup> ]                        |              | 5077.68(7)                                                                                                                                                     | 1579.03(6)                                                                                                                                       | 1513.02(7)                                                                                                                                         |
| Z                                               |              | 4                                                                                                                                                              | 4                                                                                                                                                | 2                                                                                                                                                  |
| Density (calculated) [g/cm <sup>3</sup> ]       |              | 1.450                                                                                                                                                          | 2.528                                                                                                                                            | 2.923                                                                                                                                              |
| Absorption coefficient [mm <sup>-1</sup> ]      |              | 5.208                                                                                                                                                          | 13.456                                                                                                                                           | 12.379                                                                                                                                             |
| F(000)                                          |              | 2232                                                                                                                                                           | 1096                                                                                                                                             | 1168                                                                                                                                               |
| Crystal size [mm <sup>3</sup> ]                 |              | 0.300 x 0.200 x 0.100                                                                                                                                          | 0.200 × 0.200 × 0.100                                                                                                                            | 0.300 x 0.100 x 0.020                                                                                                                              |
| Theta range for data collection [°]             |              | 3.782 to 76.783                                                                                                                                                | 3.469 to 31.476                                                                                                                                  | 3.344 to 30.856                                                                                                                                    |
| Index ranges                                    |              | -15 ≤ h ≤ 15<br>-26 ≤ k ≤ 26<br>-27 ≤ l ≤ 26                                                                                                                   | -11 ≤ h ≤ 12<br>-19 ≤ k ≤ 20<br>-17 ≤ l ≤ 18                                                                                                     | -16 ≤ h ≤ 16<br>-12 ≤ k ≤ 10<br>-19 ≤ l ≤ 20                                                                                                       |
| Reflections collected                           |              | 151357                                                                                                                                                         | 43334                                                                                                                                            | 27955                                                                                                                                              |
| Independent reflections                         |              | 20086<br>[R(int) = 0.0796]                                                                                                                                     | 4682<br>[R(int) = 0.0474]                                                                                                                        | 7379<br>[R(int) = 0.0589]                                                                                                                          |
| Completeness to theta [%]                       |              | 99.7                                                                                                                                                           | 99.6                                                                                                                                             | 99.7                                                                                                                                               |
| Refinement method                               |              | Full-matrix least-squares on F <sup>2</sup>                                                                                                                    | Full-matrix least-squares on F <sup>2</sup>                                                                                                      | Full-matrix least-squares on F <sup>2</sup>                                                                                                        |
| Data / restraints / parameters                  |              | 20086 / 6 / 1292                                                                                                                                               | 4682 / 2 / 215                                                                                                                                   | 7379 / 2 / 347                                                                                                                                     |
| Goodness-of-fit on F <sup>2</sup>               |              | 1.062                                                                                                                                                          | 1.072                                                                                                                                            | 1.010                                                                                                                                              |
| Final R indices [I > 2σ(I)]                     |              | R1 = 0.0379,<br>wR2 = 0.1043                                                                                                                                   | R1 = 0.0233,<br>wR2 = 0.0476                                                                                                                     | R1 = 0.0348,<br>wR2 = 0.0837                                                                                                                       |
| R indices (all data)                            |              | R1 = 0.0415,<br>wR2 = 0.1072                                                                                                                                   | R1 = 0.0304,<br>wR2 = 0.0491                                                                                                                     | R1 = 0.0359,<br>wR2 = 0.0846                                                                                                                       |
| Largest diff. peak and hole [e/Å <sup>3</sup> ] |              | 1.227 and -1.887                                                                                                                                               | 2.223 and -1.991                                                                                                                                 | 1.622 and -2.067                                                                                                                                   |

**Table S2.** Selected bond parameters of **1-3**.

| 1                       |            | 2              |          | 3                |           |
|-------------------------|------------|----------------|----------|------------------|-----------|
| <b>Bond lengths [Å]</b> |            |                |          |                  |           |
| W(1)-C(2)               | 2.040(3)   | W(1)-C(1)      | 2.015(7) | W(1)-C(10)       | 2.033(10) |
| W(1)-C(1)               | 2.048(3)   | W(1)-C(2)      | 2.056(8) | W(1)-C(9)        | 2.066(11) |
| W(1)-C(8)               | 2.170(3)   | W(1)-C(7)      | 2.167(7) | W(1)-C(14)       | 2.158(10) |
| W(1)-C(5)               | 2.178(3)   | W(1)-C(6)      | 2.170(7) | W(1)-C(16)       | 2.162(11) |
| W(1)-C(6)               | 2.184(3)   | W(1)-C(5)      | 2.174(7) | W(1)-C(11)       | 2.174(11) |
| W(1)-C(3)               | 2.184(3)   | W(1)-C(8)      | 2.179(7) | W(1)-C(15)       | 2.182(12) |
| W(1)-C(7)               | 2.187(3)   | W(1)-C(3)      | 2.202(5) | W(1)-C(13)       | 2.193(12) |
| W(1)-C(4)               | 2.250(3)   | W(1)-C(4)      | 2.230(8) | W(1)-C(12)       | 2.234(11) |
| W(2)-C(10)              | 2.044(3)   | W(2)-C(9)      | 2.038(7) | W(2)-C(1)        | 2.034(10) |
| W(2)-C(9)               | 2.049(3)   | W(2)-C(10)     | 2.053(8) | W(2)-C(2)        | 2.060(11) |
| W(2)-C(16)              | 2.175(3)   | W(2)-C(16)     | 2.162(7) | W(2)-C(7)        | 2.164(10) |
| W(2)-C(15)              | 2.178(3)   | W(2)-C(13)     | 2.172(7) | W(2)-C(8)        | 2.166(11) |
| W(2)-C(13)              | 2.179(3)   | W(2)-C(14)#1   | 2.180(8) | W(2)-C(6)        | 2.167(11) |
| W(2)-C(11)              | 2.179(3)   | W(2)-C(15)     | 2.184(7) | W(2)-C(5)        | 2.171(11) |
| W(2)-C(14)              | 2.182(3)   | W(2)-C(11)#2   | 2.189(6) | W(2)-C(3)        | 2.190(12) |
| W(2)-C(12)              | 2.251(4)   | W(2)-C(12)#2   | 2.227(8) | W(2)-C(4)        | 2.220(10) |
| <b>Angles [°]</b>       |            |                |          |                  |           |
| C(2)-W(1)-C(1)          | 39.15(12)  | C(1)-W(1)-C(2) | 39.5(2)  | C(10)-W(1)-C(9)  | 39.1(4)   |
| C(2)-W(1)-C(8)          | 97.28(13)  | C(1)-W(1)-C(7) | 79.9(3)  | C(10)-W(1)-C(14) | 80.3(4)   |
| C(1)-W(1)-C(8)          | 92.99(12)  | C(2)-W(1)-C(7) | 109.2(3) | C(9)-W(1)-C(14)  | 114.4(4)  |
| C(2)-W(1)-C(5)          | 117.39(12) | C(1)-W(1)-C(6) | 99.8(3)  | C(10)-W(1)-C(16) | 101.7(4)  |
| C(1)-W(1)-C(5)          | 78.91(12)  | C(2)-W(1)-C(6) | 84.6(3)  | C(9)-W(1)-C(16)  | 86.1(4)   |
| C(8)-W(1)-C(5)          | 72.73(12)  | C(7)-W(1)-C(6) | 71.1(2)  | C(14)-W(1)-C(16) | 141.0(4)  |
| C(2)-W(1)-C(6)          | 83.67(13)  | C(1)-W(1)-C(5) | 82.2(3)  | C(10)-W(1)-C(11) | 80.8(4)   |
| C(1)-W(1)-C(6)          | 110.07(12) | C(2)-W(1)-C(5) | 115.6(3) | C(9)-W(1)-C(11)  | 109.1(4)  |
| C(8)-W(1)-C(6)          | 141.40(12) | C(7)-W(1)-C(5) | 72.8(3)  | C(14)-W(1)-C(11) | 71.2(4)   |
| C(5)-W(1)-C(6)          | 140.35(12) | C(6)-W(1)-C(5) | 142.9(3) | C(16)-W(1)-C(11) | 70.8(4)   |
| C(2)-W(1)-C(3)          | 76.10(13)  | C(1)-W(1)-C(8) | 95.6(3)  | C(10)-W(1)-C(15) | 97.5(4)   |
| C(1)-W(1)-C(3)          | 111.50(13) | C(2)-W(1)-C(8) | 85.5(3)  | C(9)-W(1)-C(15)  | 89.9(4)   |
| C(8)-W(1)-C(3)          | 71.31(12)  | C(7)-W(1)-C(8) | 146.5(2) | C(14)-W(1)-C(15) | 72.5(4)   |
| C(5)-W(1)-C(3)          | 142.94(13) | C(6)-W(1)-C(8) | 141.8(2) | C(16)-W(1)-C(15) | 143.6(4)  |
| C(6)-W(1)-C(3)          | 71.53(13)  | C(5)-W(1)-C(8) | 73.7(3)  | C(11)-W(1)-C(15) | 143.4(4)  |
| C(2)-W(1)-C(7)          | 102.06(13) | C(1)-W(1)-C(3) | 123.5(3) | C(10)-W(1)-C(13) | 124.3(4)  |

|                |            |                |          |                  |          |
|----------------|------------|----------------|----------|------------------|----------|
| C(1)-W(1)-C(7) | 83.50(12)  | C(2)-W(1)-C(3) | 84.1(3)  | C(9)-W(1)-C(13)  | 85.4(4)  |
| C(8)-W(1)-C(7) | 143.87(12) | C(7)-W(1)-C(3) | 138.7(3) | C(14)-W(1)-C(13) | 139.0(4) |
| C(5)-W(1)-C(7) | 71.31(12)  | C(6)-W(1)-C(3) | 71.5(3)  | C(16)-W(1)-C(13) | 71.5(4)  |
| C(6)-W(1)-C(7) | 71.56(12)  | C(5)-W(1)-C(3) | 137.5(3) | C(11)-W(1)-C(13) | 138.2(4) |
| C(3)-W(1)-C(7) | 143.02(12) | C(8)-W(1)-C(3) | 70.8(3)  | C(15)-W(1)-C(13) | 72.1(4)  |
| C(2)-W(1)-C(4) | 160.35(13) | C(1)-W(1)-C(4) | 156.2(2) | C(10)-W(1)-C(12) | 156.7(4) |
| C(1)-W(1)-C(4) | 160.50(13) | C(2)-W(1)-C(4) | 163.3(2) | C(9)-W(1)-C(12)  | 163.8(4) |
| C(8)-W(1)-C(4) | 85.07(12)  | C(7)-W(1)-C(4) | 79.7(3)  | C(14)-W(1)-C(12) | 80.7(4)  |
| C(5)-W(1)-C(4) | 82.00(12)  | C(6)-W(1)-C(4) | 85.0(3)  | C(16)-W(1)-C(12) | 84.8(4)  |
| C(6)-W(1)-C(4) | 82.47(12)  | C(5)-W(1)-C(4) | 80.2(2)  | C(11)-W(1)-C(12) | 80.4(4)  |
| C(3)-W(1)-C(4) | 86.31(13)  | C(8)-W(1)-C(4) | 94.7(3)  | C(15)-W(1)-C(12) | 89.5(4)  |
| C(7)-W(1)-C(4) | 86.67(13)  | C(3)-W(1)-C(4) | 80.1(2)  | C(13)-W(1)-C(12) | 79.0(4)  |

**Table S3.** Intermetallic distances in **2** and **3** [Å].

|          |           |                         |
|----------|-----------|-------------------------|
| <b>2</b> |           |                         |
| W1       | 4.5802(5) | Rb1 [-x,1/2+y,1/2-z]    |
|          | 4.9206(5) | Rb2 [-1+x,1/2-y,-1/2+z] |
| Rb1      | 4.3730(6) | Rb2                     |
|          | 4.5802(5) | W1 [-x,-1/2+y,1/2-z]    |
|          | 4.8712(7) | Rb2 [1-x,-y,1-z]        |
|          | 4.9599(6) | Rb2 [x,1/2-y,-1/2+z]    |
| Rb2      | 4.3730(6) | Rb1                     |
|          | 4.8712(7) | Rb1 [1-x,-y,1-z]        |
|          | 4.9206(5) | W1 [1+x,1/2-y,1/2+z]    |
|          | 4.9599(6) | Rb1 [x,1/2-y,1/2+z]     |
| <b>3</b> |           |                         |
| W1       | 4.6614(1) | Cs4 [-1+x,y,z]          |
|          | 4.7074(1) | Cs2 [x,1-y,-1/2+z]      |
| W2       | 4.6127(1) | Cs3                     |
|          | 4.6673(1) | Cs1 [1+x,1-y,-1/2+z]    |
| Cs1      | 4.5788(1) | Cs2 [x,1-y,1/2+z]       |
|          | 4.7753(1) | Cs2 [x,1+y,z]           |
|          | 4.7970(1) | Cs4 [-1+x,y,z]          |
| Cs2      | 4.5510(1) | Cs3 [-1+x,y,z]          |
| Cs3      | 4.8652(1) | Cs4 [x,1-y,1/2+z]       |
